# Supplementary material
Source: PubMed Central journal article supplement (PMC2990125)
Supplement: supp_tpc.110.077727_Bednarek_Supplemental_Data_Final.pdf [file supp_tpc.110.077727_Bednarek_Supplemental_Data_Final.pdf]

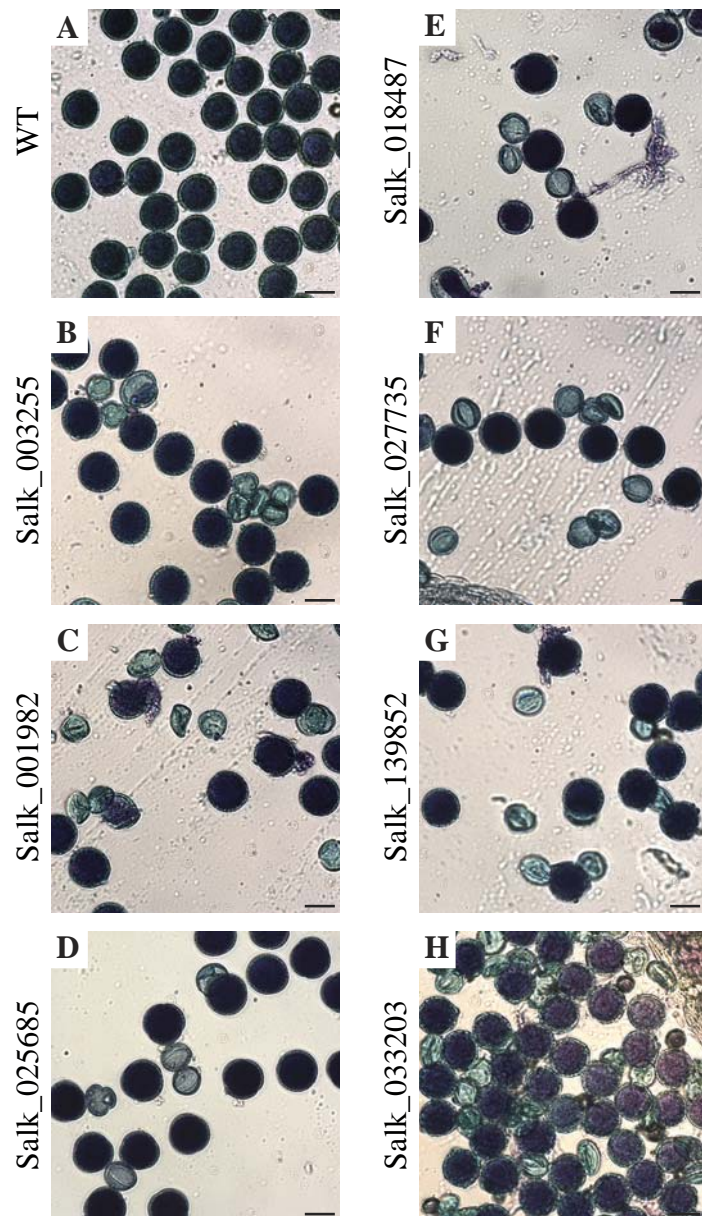

**Supplemental Figure 3: Alexander staining of pollen lethal mutants**

Developing pollen at the bicellular and tricellular stage of development from the F1 progeny of a cross between WT Ler and either WT Col (A) or a Salk insertional allele (B-H) was stained with Alexander's Stain to determine pollen viability and viewed by light microscopy. Scale bars: 20  $\mu$ m.

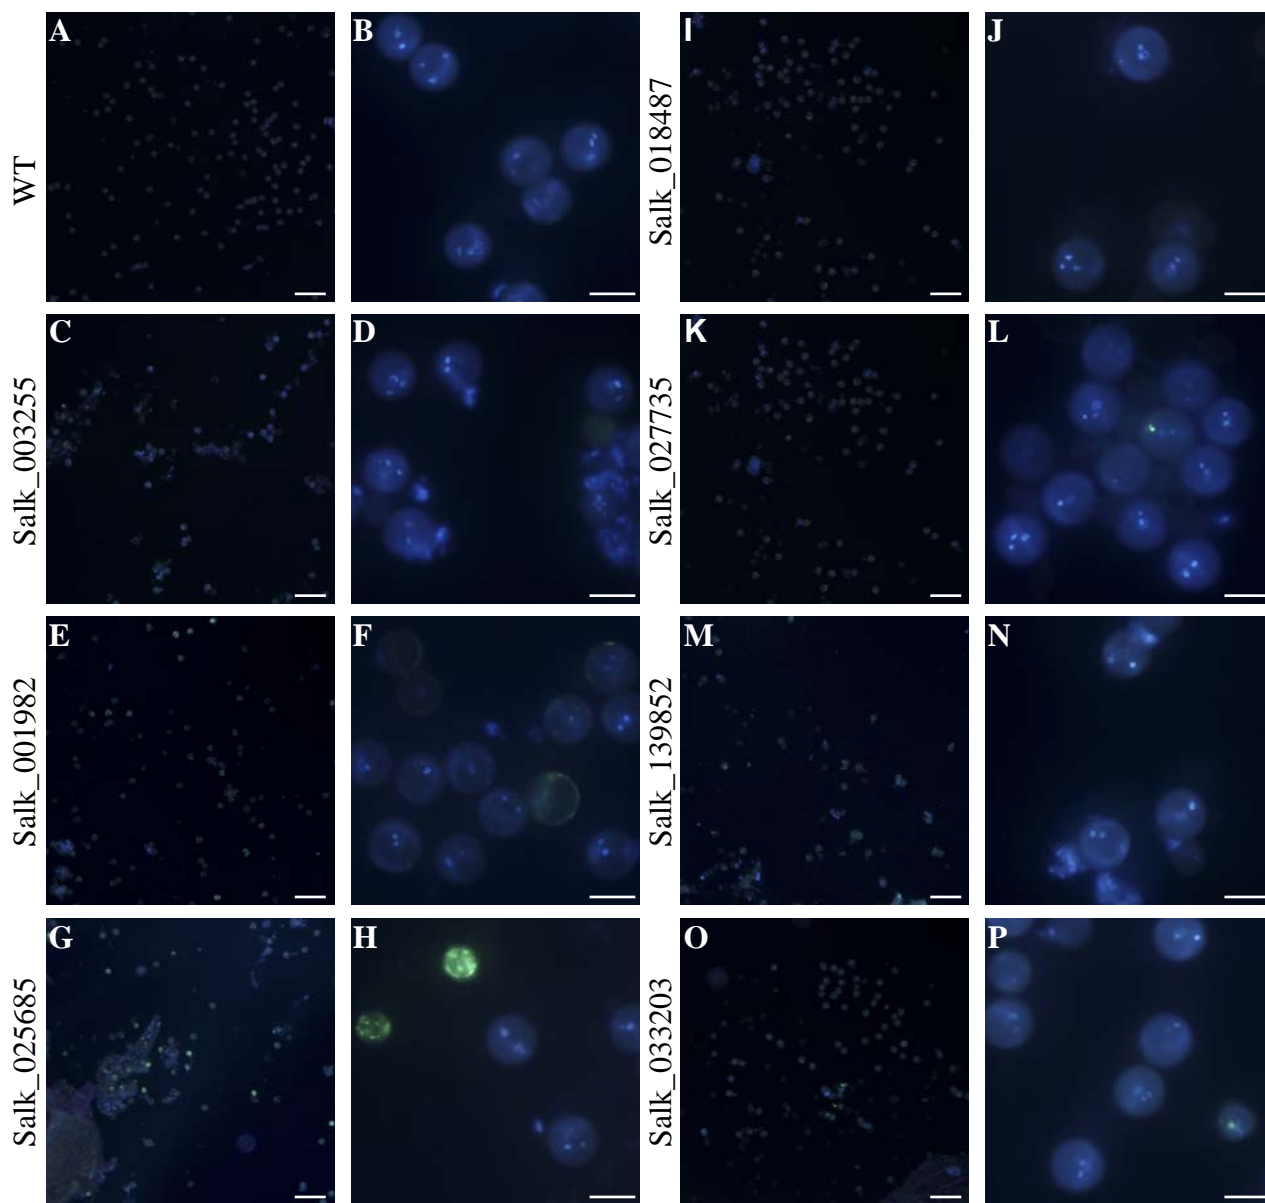

**Supplemental Figure 4: Aniline blue staining of pollen lethal mutants**

Developing pollen at the bicellular and tricellular stage of development from the F1 progeny of a cross between WT Ler and either WT Col (A-B) or a Salk insertional allele that shows pollen lethality upon outcrossing (C-P) was stained with DAPI to label the nuclei (blue) and aniline blue to label callose (yellow-green) and viewed under fluorescent optics. Scale bars: 100  $\mu$ m in (A,C,E,G,I,K,M,O) and 20  $\mu$ m in (B,D,F,G,H,J,L,N,P).

| genotype                              | <i>WT</i> | <i>drp2AaBB</i> | <i>drp2AABb</i> | <i>drp2AaBb</i> | N=  |
|---------------------------------------|-----------|-----------------|-----------------|-----------------|-----|
| expected %                            | ≤25       | ≥25             | ≥25             | ≤25             |     |
| <i>WT</i> ♀<br>X<br><i>drp2AaBb</i> ♂ | 19        | 46              | 34              | 0.5             | 198 |
| <i>drp2AaBb</i> ♀<br>X<br><i>WT</i> ♂ | 18        | 43              | 39              | 0               | 120 |

**Table S1: Analysis of progeny from *drp2AaBb/WT* reciprocal crosses**

The genotype of F1 progeny from reciprocal crosses between *DRP2A/drp2a-1*; *DRP2B/drp2b-2* and *WT* plants was determined by PCR amplification using allele-specific primers. Percentage of offspring recovered with each genotype is indicated, and compared to the percentage that would be expected if there were no transmission defects. The ≤ and ≥ symbols reflect potential minor deviations from the expected percentages due to the possibility of a small degree of linkage between *DRP2A* and *DRP2B*, which are found on opposite arms of chromosome 1.

| primer | sequence (5' > 3')                |
|--------|-----------------------------------|
| 747    | gatctttgccgaaaacaattggagg         |
| 748    | cgacttgctattagaaagaaagagat        |
| 774    | aacgtccgcaatgtgtattaaagtgtc       |
| 858    | taacctgttacgtttaccctttacattgcagct |
| 859    | atccactcgttcttgcgactacactctca     |
| 861    | actgtttctggtaacggctctctcgtcttt    |
| 865    | tccatgagacaaaagtctttcagaaggct     |
| 926    | gggtgatggttcacgtagtgggccatcg      |
| 962    | gctgataattcctactg                 |
| 964    | ctgatgatgaaggagaaaaatc            |
| 968    | ctctcagattc gatgaagcag            |
| 1055   | gacgaagacacacacagac               |
| 1056   | ccaaactcatatatatgtgtctctc         |
| 1160   | gatgttttgattcttcatctcttcggtc      |
| 1161   | tgcgtagatttagaggtaaaactcatt       |
| 1162   | acacacacagacaaaactcctagctta       |

| primer | sequence (5' > 3')              |
|--------|---------------------------------|
| 1163   | tagtagacaggacaacacaaaagtgggttac |
| 1164   | cttctctccatatatgtgctttcttcat    |
| 1165   | taacagttcgaagaattaaagtgagacaa   |
| 1171   | atcgttttacatgaaaatatataatgtgg   |
| 1172   | ttcttataatgattgatttatgtaccttga  |
| 1055   | gacgaagacacacacagac             |
| 1056   | ccaaactcatatatatgtgtctctc       |
| 1160   | gatgttttgattcttcatctcttcggtc    |
| 1161   | tgcgtagatttagaggtaaaactcatt     |
| 1162   | acacacacagacaaaactcctagctta     |
| 1163   | tagtagacaggacaacacaaaagtgggttac |
| 1164   | cttctctccatatatgtgctttcttcat    |
| 1165   | taacagttcgaagaattaaagtgagacaa   |
| 1171   | atcgttttacatgaaaatatataatgtgg   |
| 1172   | ttcttataatgattgatttatgtaccttga  |

**Table S2: Oligonucleotides used in this study**
